# Supplementary material
Source: PubMed Central journal article supplement (PMC2716522)
Supplement: mmc1.pdf [file mmc1.pdf]

Biophysical Journal, Volume 96

**Supplementary Material**

**Thermal Stability of Apolipoprotein A-I in High Density Lipoproteins by Molecular Dynamics**

Martin K. Jones, Andrea Catta, James C. Patterson, Feifei Gu, Jianguo Chen, Ling Li,  
and Jere P. Segrest

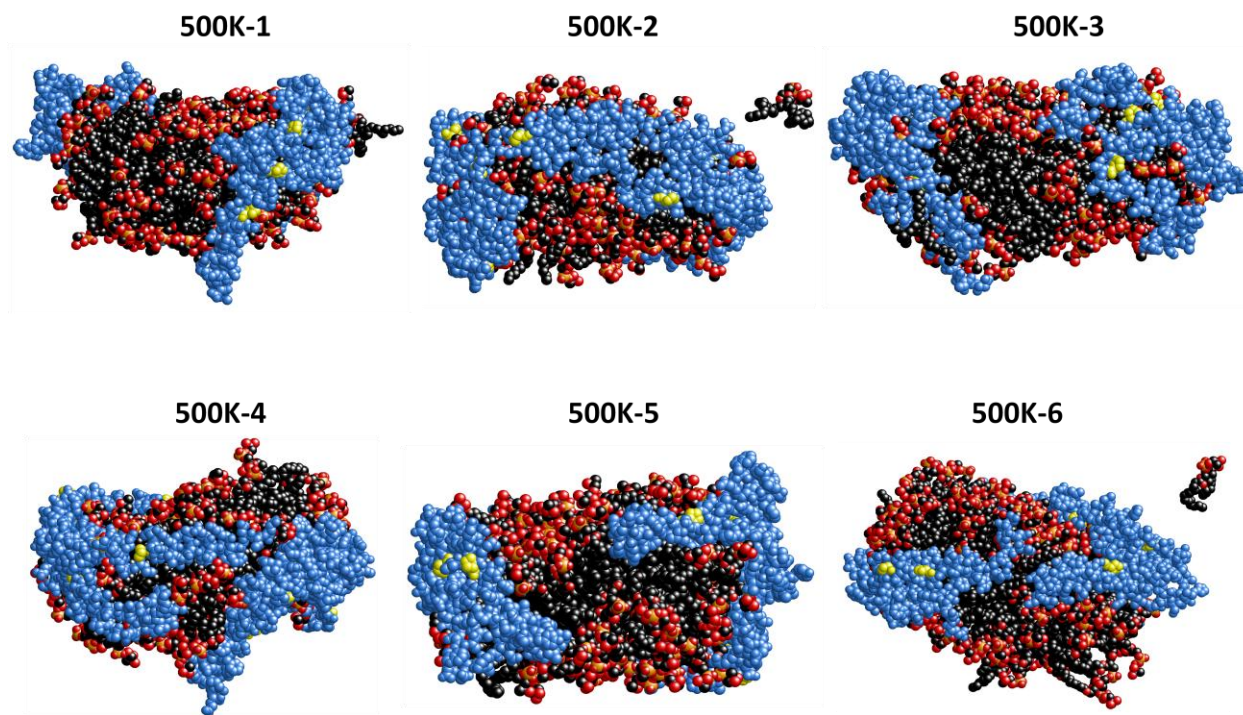

**Figure S1. Structures of each of the six 500 K simulations of 100:2 at 20 ns. (500K-1-3)** Three simulations of independent particle I-1. **(500K-4-6)** Three simulations of independent particle I-2. The structures in spacefilling representation are viewed from the terminal domain side of the particles with the same orientations as in **Fig. 2**. (*Skyblue*) protein; (*yellow*) prolines; (*black*) POPC acyl chains; (*red and gold*) headgroups.

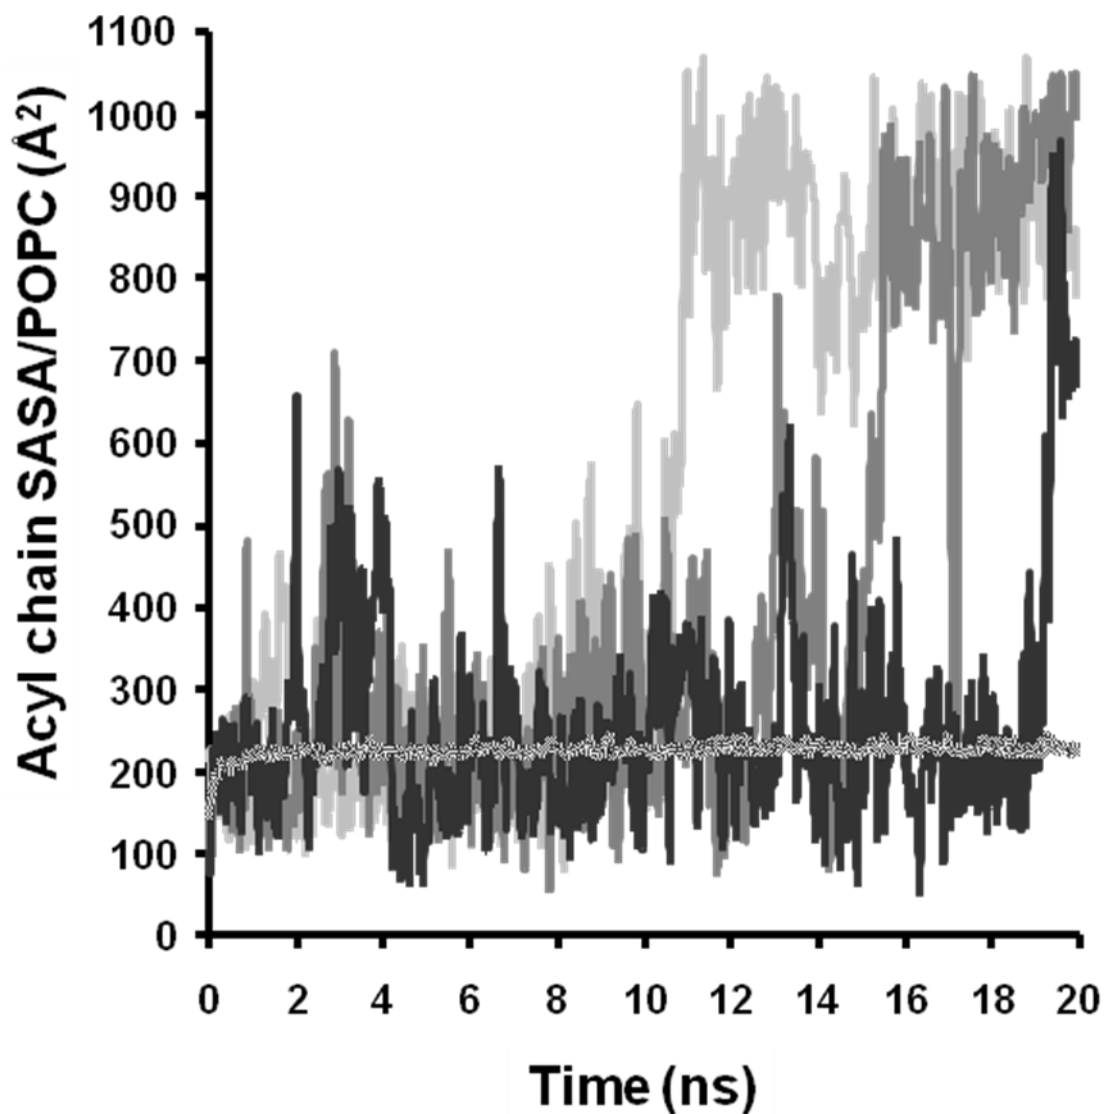

**Figure S2.** Changes in SASA of the acyl chains per POPC for each of the three single POPC molecules desorbed from its 100:2 particle at 500 K plotted over 20 ns compared with changes in mean SASA of the six simulations at each time point. (*Widely fluctuating lines*) changes in SASA of each of the three single POPC molecules desorbed from its 100:2 particle at each time point; (*narrowly fluctuating line*) changes in mean SASA of the six simulations at each time point.

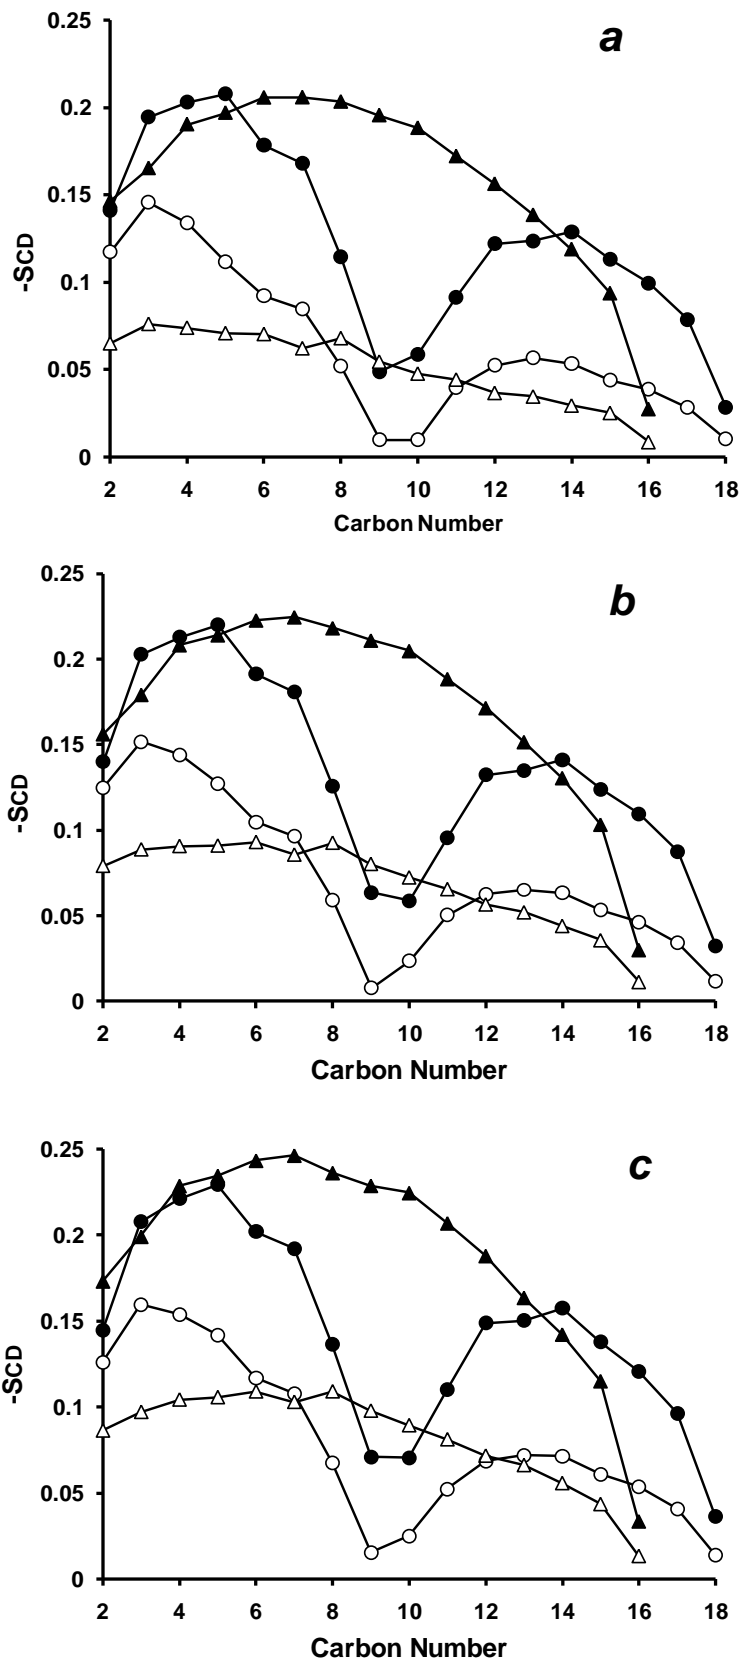

**Figure S3.** Average order parameters calculated for POPC within and not within 6, 8 and 10 Å over the last 40% of simulations at 310 K for I-1 and I-2 particles.

The values for the SCD are averages over both hydrogen atoms on each methylene carbon and are shown as triangles for the sn-1 (palmitoyl) chain and as circles for the sn-2 (oleoyl) chain. (a) Plot of average order parameters calculated for all POPC within (*open symbols*) and not within (*closed symbols*) 6 Å of protein. (b) Plot of average order parameters calculated for all POPC within (*open symbols*) and not within (*closed symbols*) 8 Å of protein. (c) Plot of average order parameters calculated for all POPC within (*open symbols*) and not within (*closed symbols*) 10 Å of protein.

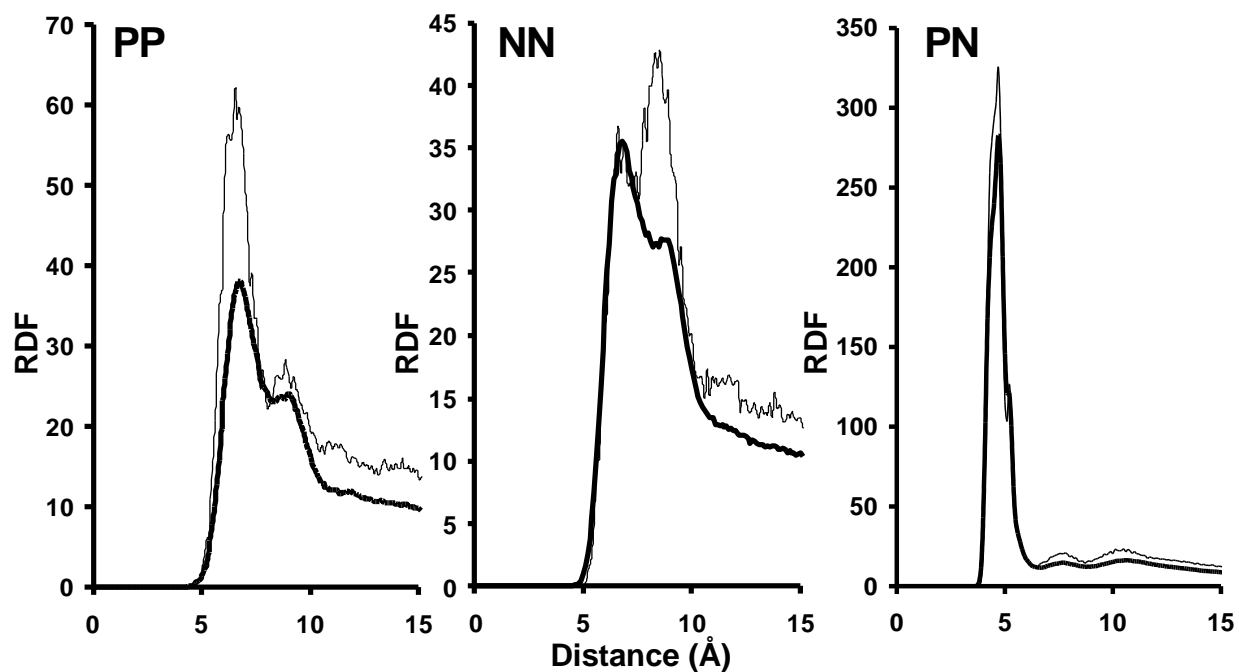

**Figure S4.** Mean radial distribution functions (RDF) of: phosphorus (PP), nitrogen (NN) and phosphorous-nitrogen (PN) for the POPC for the six 100:2 particle MD simulations plotted over the last 20% of the 20 ns simulations. (*Gray lines*) 310 K simulations; (*black lines*) 500 K simulations.

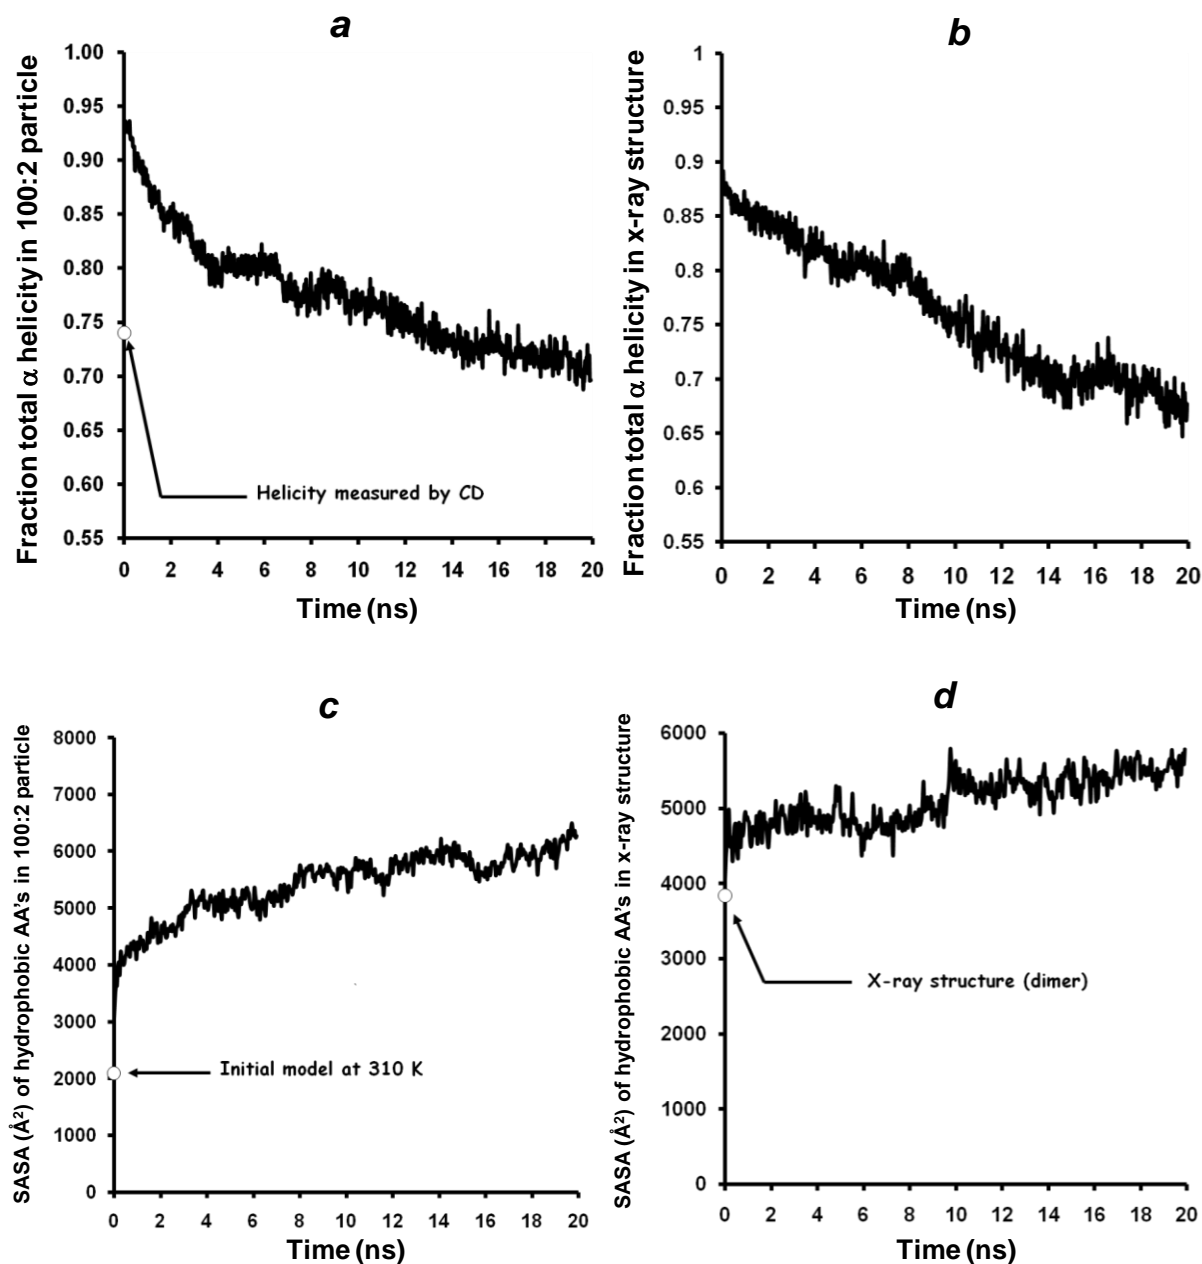

**Figure S5. Changes in global  $\alpha$  helicity and solvent accessible surface area of hydrophobic amino acid residues during 20 ns MD simulations at 500 K of the 100:2 particles I-1 and I-2 versus the control  $\Delta 43\text{apoA-I}$ .** (*a*) Changes in global  $\alpha$  helicity of the six 100:2 particle MD simulations at 500 K plotted over 20 ns. (*Gray lines*) changes in global  $\alpha$  helicity of each of the six individual simulations at each time point; (*black line*) change in mean global  $\alpha$  helicity of the six simulations at each time point. (*b*) Changes in global  $\alpha$  helicity of the close AB and CD pairs of each of the two MD simulations performed on the control  $\Delta 40\text{apoA-I}$  structure at 500 K plotted over 20 ns. (*Gray lines*) changes in global  $\alpha$  helicity for each of the four close pairs at each time point; (*black line*) change in mean global  $\alpha$  helicity of the four close pair simulations at each time point. (*c*) Changes in solvent accessible surface areas (SASA) of the hydrophobic amino acid residues for the six 100:2 particle MD simulations at 500 K

**BL-1**

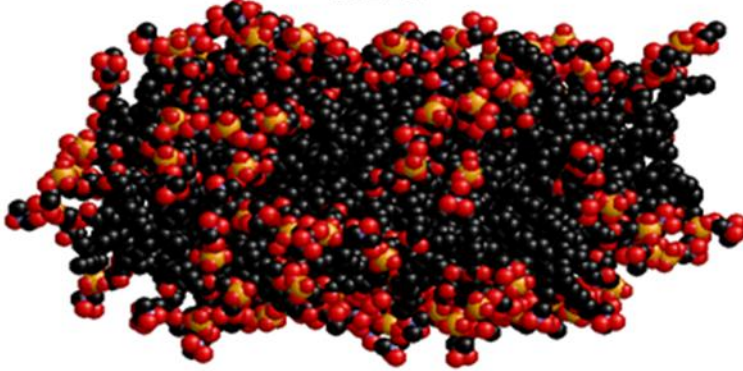

**BL-2**

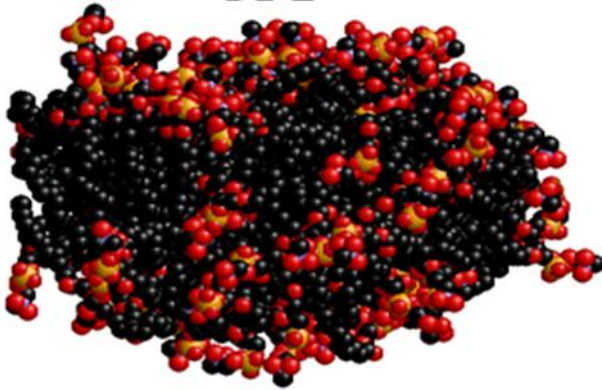

**BL-3**

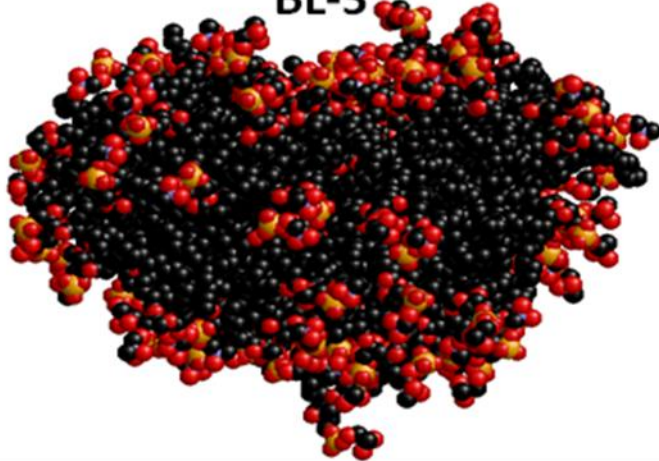

**Figure S6. Structures of the three 500 K simulations of ‘naked’ lipid bilayer discs containing 100 POPC at 20 ns. The structures are in spacefilling representation. (*Black*) POPC acyl chains; (*red and gold*) headgroups.**
